# Supplementary material for: Patulin Stimulates Progenitor Leydig Cell Proliferation but Delays Its Differentiation in Male Rats during Prepuberty
Source: MDPI journal article supplement (doi:10.3390/toxins15090581), 2023-09-20
Supplement: s1 [file s1]

# Supplementary Materials: Patulin Stimulates Progenitor Leydig Cell Proliferation but Delays Its Differentiation in Male Rats during Prepuberty

Huitao Li <sup>1,2,3,†</sup>, Ming Su <sup>1,†</sup>, Hang Lin <sup>1</sup>, Jingjing Li <sup>1</sup>, Shaowei Wang <sup>1</sup>, Lei Ye <sup>1</sup>, Xingwang Li <sup>1</sup> and Renshan Ge <sup>1,2,3,\*</sup>

<sup>1</sup> Department of Anesthesiology and Perioperative Medicine, The Second Affiliated Hospital and Yuying Children's Hospital, Wenzhou Medical University, Wenzhou 325027, China; lihuihao1991@163.com (H.L.); suming2000@163.com (M.S.); lh1014794144@163.com (H.L.); lbling68@163.com (J.L.); smilewei9898@163.com (S.W.); leiye3567@163.com (L.Y.); li-xingwang@163.com (X.L.)

<sup>2</sup> Key Laboratory of Pediatric Anesthesiology, Ministry of Education, Wenzhou Medical University, Wenzhou 325027, China

<sup>3</sup> Key Laboratory of Environment and Male Reproductive Medicine of Wenzhou, and Key Laboratory of Structural Malformations in Children of Zhejiang Province, The Second Affiliated Hospital and Yuying Children's Hospital, Wenzhou Medical University, Wenzhou 325027, China

\* Correspondence: rensan\_ge@wmu.edu; Tel.: +86-577-88002198

† These authors contributed equally to this work.

**Supplementary Table S1.** Primer information for quantitative polymerase chain reaction.

| Primer Symbol  | Gene Name                                  | Primer Direction | Sequences (5'to 3')      | PCR (bp) | Accession    |
|----------------|--------------------------------------------|------------------|--------------------------|----------|--------------|
| <i>Lhcgr</i>   | Luteinizing hormone receptor               | Forward          | CTGCGCTGTCCTGGCC         | 102      | NM_012978    |
|                |                                            | Reverse          | CGACCTCATTAAGTCCCCTGAA   |          |              |
| <i>Scarb1</i>  | Scavenger receptor class B, member 1       | Forward          | ATGGTACTGCCGGGCAGAT      | 117      | NM_031541    |
|                |                                            | Reverse          | CGAACACCCTTGATTCCTGGTA   |          |              |
| <i>Star</i>    | Steroidogenic acute regulatory protein     | Forward          | CCCAAATGTCAAGGAAATCA     | 187      | NM_031558    |
|                |                                            | Reverse          | AGGCATCTCCCCAAAGTG       |          |              |
| <i>Cyp11a1</i> | Cholesterol side chain cleavage enzyme     | Forward          | AAGTATCCGTGATGTGGG       | 127      | NM_017286    |
|                |                                            | Reverse          | TCATACAGTGTCGCCTTTTCT    |          |              |
| <i>Hsd3b1</i>  | 3 $\beta$ -Hydroxysteroid dehydrogenase 1  | Forward          | CCCTGCTCTACTGGCTTGC      | 189      | NM_001007719 |
|                |                                            | Reverse          | TCTGCTTGGCTTCCTCCC       |          |              |
| <i>Cyp17a1</i> | P450 17 $\alpha$ -hydroxylase/17,20-lyase  | Forward          | TGGCTTTCCTGGTGCACAATC    | 90       | NM_012753    |
|                |                                            | Reverse          | TGAAAGTTGGTGTTCGGCTGAAG  |          |              |
| <i>Hsd11b1</i> | Hydroxysteroid 11 $\beta$ -dehydrogenase 1 | Forward          | GAAGAAGCATGGAGGTCAAC     | 133      | NM_017080    |
|                |                                            | Reverse          | GCAATCAGAGGTTGGGTCAT     |          |              |
| <i>Hsd17b3</i> | 17 $\beta$ -Hydroxysteroid dehydrogenase 3 | Forward          | TGAAAGTTGGTGTTCGGCTGAAG  | 202      | NM_054007    |
|                |                                            | Reverse          | CCACAAGCCAATACAACTAACT   |          |              |
| <i>Insl3</i>   | Insulin-like 3                             | Forward          | GTGGCTGGAGCAACGACA       | 102      | NM_053680    |
|                |                                            | Reverse          | AGAAGCCTGGTGAGGAAGC      |          |              |
| <i>Srd5a1</i>  | 5 $\alpha$ -Reductase 1                    | Forward          | TCACCAGAGCGAAGCAGC       | 92       | NM_017070    |
|                |                                            | Reverse          | CTAAAGCACAAATGGAATCAGTAT |          |              |
| <i>Akr1c14</i> | 3 $\alpha$ -Hydroxysteroid dehydrogenase   | Forward          | GCAGCGTGGGGTTGTG         | 172      | NM_138547    |
|                |                                            | Reverse          | TGGATGATTGGGATGGTCA      |          |              |
| <i>Sox9</i>    | SRY box 9                                  | Forward          | TGCTGAACGAGAGCGAGAAG     | 160      | NM_080403    |
|                |                                            | Reverse          | ATGTGAGTCTGTTCGGTGGC     |          |              |
| <i>Dhh</i>     | Desert hedgehog                            | Forward          | AACCCCGACATAATCTTCA      | 150      | NM_053367    |
|                |                                            | Reverse          | CTCGTCCCAACCTTCAGT       |          |              |
| <i>Fshr</i>    | Follicle-stimulating hormone receptor      | Forward          | CCACAAGCCAATACAACTAACT   | 327      | NM_199237    |
|                |                                            | Reverse          | CAAAAGTCCAGCCCAATACC     |          |              |

|              |                          |         |                            |     |              |
|--------------|--------------------------|---------|----------------------------|-----|--------------|
| <i>Sod1</i>  | Superoxide dismutase 1   | Forward | GCCGTGTGCGTGCTGAAGG        | 99  | NM_011434    |
|              |                          | Reverse | TGTAATCTGTCCTGACACCACAACTG |     |              |
| <i>Sod2</i>  | Superoxide dismutase 2   | Forward | TCCCTGACCTGCCTTACGACTATG   | 130 | NM_013671    |
|              |                          | Reverse | TCGTGGTACTTCTCCTCGGTGAC    |     |              |
| <i>Gpx1</i>  | Glutathione peroxidase 1 | Forward | TGCAATCAGTTCGGACATCAGGAG   | 129 | NM_001329528 |
|              |                          | Reverse | CTCACCATTACCTCGCACTTCTC    |     |              |
| <i>Cat</i>   | Catalase                 | Forward | AGCGGATTCCTGAGAGAGTGGTAC   | 147 | NM_012520    |
|              |                          | Reverse | CTGTGGAGAATCGGACGGCAATAG   |     |              |
| <i>Rps16</i> | Ribosomal protein S16    | Forward | AAGTCTTCGGACGCAAGAAA       | 148 | NM_001169146 |
|              |                          | Reverse | TTGCCCAGAAGCAGAACAG        |     |              |

**Table S2.** Antibodies information for Western blot, immunohistochemistry and immunofluorescence.

| Antibody            | Species | Vendor (City, State,)                   | Dilution |       |       |
|---------------------|---------|-----------------------------------------|----------|-------|-------|
|                     |         |                                         | WB       | IHC   | IF    |
| ACTB                | Rabbit  | Bioworld Technology (Minnesota, CA)     | 1:10000  | ND    | ND    |
| CYP11A1             | Rabbit  | Cell Signaling Technology (Danvers, MA) | 1:1000   | 1:400 | ND    |
| HSD11B1             | Rabbit  | Abcam (San Francisco, CA)               | 1:1000   | 1:200 | ND    |
| SOX9                | Rabbit  | Cell Signaling Technology (Danvers, MA) | ND       | 1:200 | ND    |
| PCNA                | Mouse   | Abcam (San Francisco, CA)               | ND       | ND    | 1:200 |
| LHCGR               | Rabbit  | Abcam (San Francisco, CA)               | 1:1000   | ND    | ND    |
| SCARB1              | Rabbit  | Abclonal (Wuhan, CN)                    | 1:1000   | ND    | ND    |
| CYP17A1             | Rabbit  | Abcam (San Francisco, CA)               | 1:10000  | ND    | ND    |
| pAKT1               | Rabbit  | Abcam (San Francisco, CA)               | 1:5000   | ND    | ND    |
| AKT1                | Rabbit  | Abcam (San Francisco, CA)               | 1:5000   | ND    | ND    |
| P53                 | Rabbit  | Cell Signaling Technology (Danvers, MA) | 1:1000   | ND    | ND    |
| CREB                | Rabbit  | Abcam (San Francisco, CA)               | 1:1000   | ND    | ND    |
| pCREB               | Rabbit  | Abcam (San Francisco, CA)               | 1:5000   | ND    | ND    |
| CCND1               | Rabbit  | Proteintech Group, Inc. (Chicago, CA)   | 1:10000  | ND    | ND    |
| P27                 | Rabbit  | Abclonal (Wuhan, CN)                    | 1:1000   | ND    | ND    |
| ERK <sub>1/2</sub>  | Mouse   | Abcam (San Francisco, CA)               | 1:10000  | ND    | ND    |
| pERK <sub>1/2</sub> | Mouse   | Abcam (San Francisco, CA)               | 1:1000   | ND    | ND    |

ND = Not detected; WB = Western blot; HS = Histochemical staining; IHC = Immunohistochemistry; IF = Immunofluorescence.

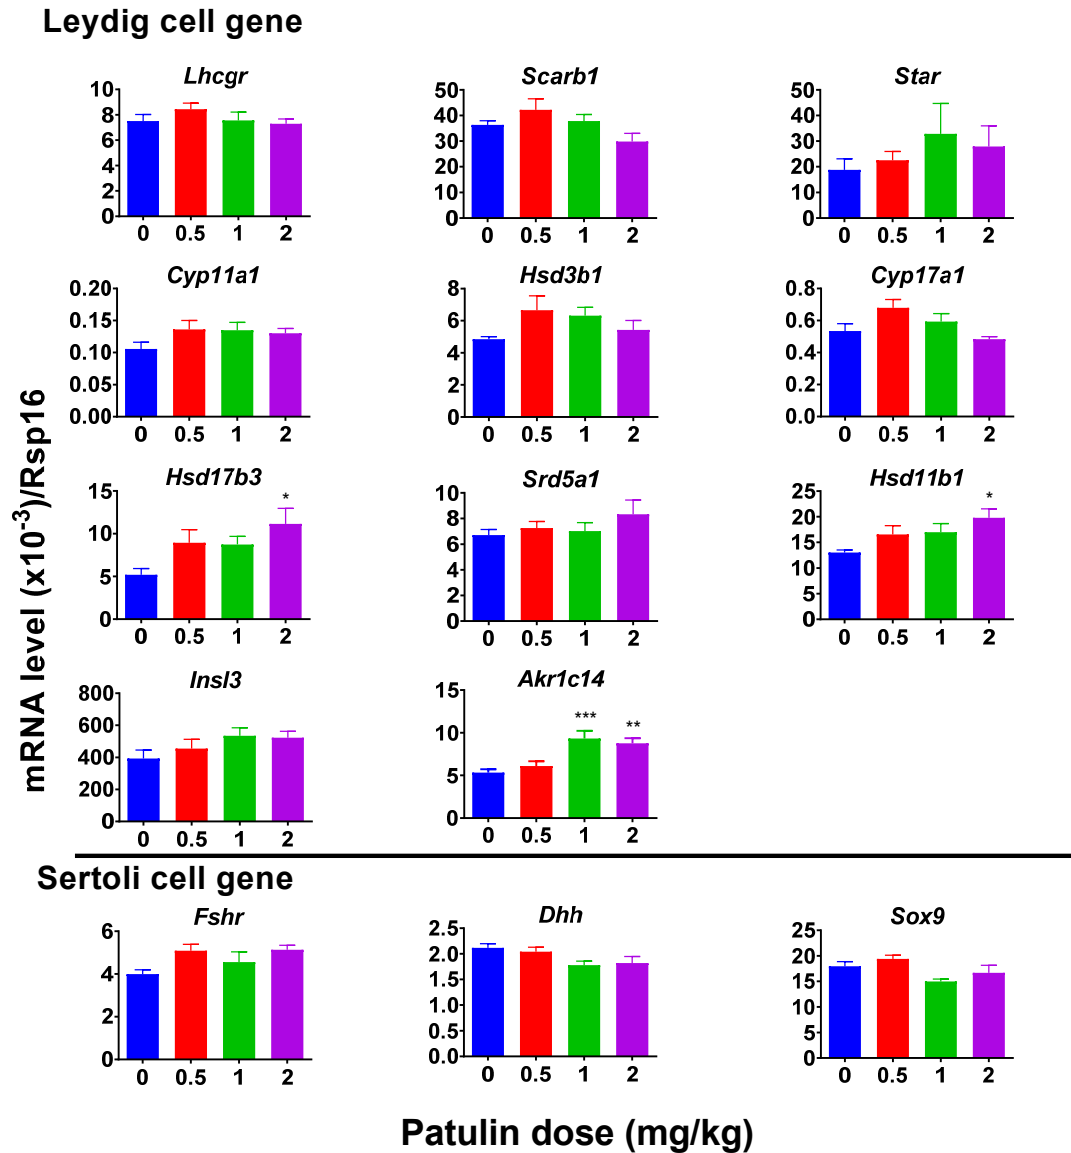

**Figure S1.** Effects of patulin on mRNA expression of rat testis. Mean  $\pm$  SEM,  $n = 6$ . \*  $p < 0.05$ , \*\*  $p < 0.01$ , \*\*\*  $p < 0.001$  show significant differences from the control group (patulin 0 mg/kg/day).

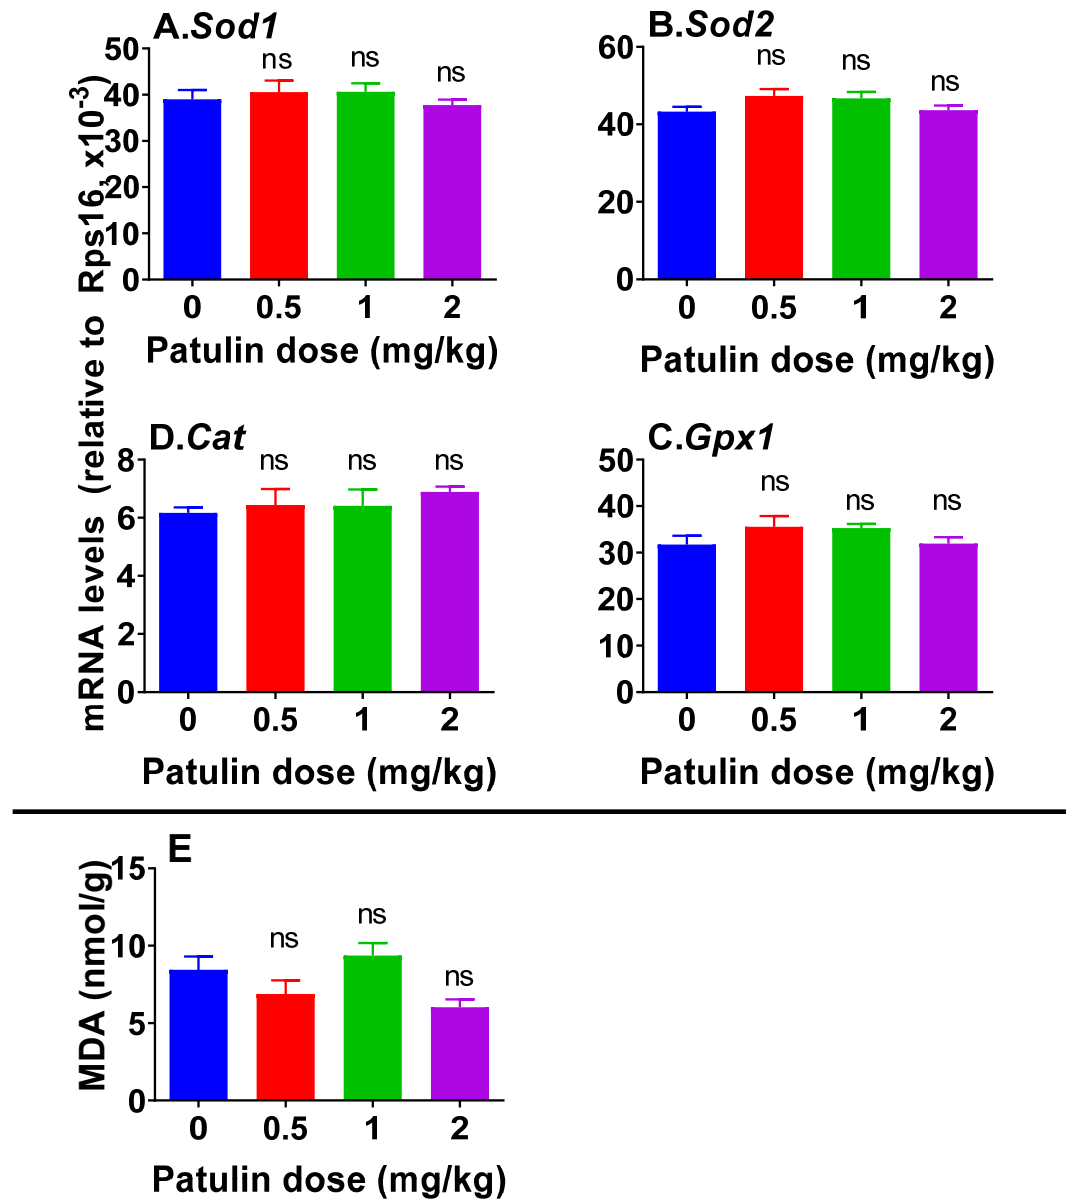

**Figure S2.** Effects of patulin on antioxidant mRNA expression of rat testis and MDA levels. Mean  $\pm$  SEM, n = 6. <sup>ns</sup>  $p > 0.05$  show significant differences from the control group (patulin 0 mg/kg/day).
